# Supplementary material for: Improved Assessment of Orbital Stability of Rhythmic Motion with Noise
Source: PLOS journal article supplement (doi:10.1371/journal.pone.0119596), 2015-03-23
Supplement: S1 (10.1371/journal.pone.0119596.s001) [file journal.pone.0119596.s001]

# Appendix S1

## Bias of Floquet Multiplier Estimation by Linear Regression

The linear regression or least square fit estimates the Floquet multiplier as

$$\hat{\lambda} = \frac{\sum_{i=1}^{n-1} (x_i - \bar{x})(y_i - \bar{y})}{\sum_{i=1}^{n-1} (x_i - \bar{x})^2},$$

where  $\bar{x}$  and  $\bar{y}$  are the mean of  $\{x_1, x_2, x_3, \dots, x_{n-1}\}$  and  $\{x_2, x_3, x_4, \dots, x_n\}$  respectively, and  $y_i = \lambda x_i + \delta_{i+1}$ . The expectation of the bias becomes

$$E(\hat{\lambda} - \lambda) = E \left( \frac{\sum_{i=1}^{n-1} \{(x_i - \bar{x})(y_i - \bar{y}) - \lambda(x_i - \bar{x})^2\}}{\sum_{i=1}^{n-1} (x_i - \bar{x})^2} \right). \quad (S1)$$

Assuming a stable periodic process, or  $|\lambda| < 1$ , the AR process becomes stationary and thus has finite mean and variance, satisfying

$$E(x_{i+1}) = E(y_i) = E(x_i), \text{ and} \\ \text{var}(x_{i+1}) = \text{var}(y_i) = \text{var}(x_i).$$

The mean of  $x_i$ , or  $\bar{x}$  is the solution of

$$E(x_{i+1}) = \lambda E(x_i) - E(\delta_{i+1}) = \lambda E(x_i) = E(x_i), \text{ which is zero.}$$

Therefore, re-writing the equation for the variance,

$$\sigma_x^2 = E(x_{i+1}^2) - E(x_{i+1})^2 = E(x_i^2) - E(x_i)^2, \text{ or}$$

$$\sigma_x^2 = E(x_{i+1}^2) = E((\lambda x_i + \delta_{i+1})^2) = \lambda^2 E(x_i^2) + 2\lambda E(x_i \delta_{i+1}) + E(\delta_{i+1}^2) = E(x_i^2).$$

By definition,  $x_i$  is a weighted sum of  $\delta_1, \delta_2, \delta_3, \dots, \delta_i$ , none of which is correlated with  $\delta_{i+1}$ . Therefore,  $E(x_i \delta_{i+1})$  becomes zero. Then,

$$\sigma_x^2 = \lambda^2 E(x_i^2) + E(\delta_{i+1}^2) = \lambda^2 \sigma_x^2 + \sigma_\delta^2, \text{ or } \sigma_x^2 = \frac{\sigma_\delta^2}{1 - \lambda^2},$$

where  $\sigma_\delta$  is the standard deviation of the noise,  $\delta_k$ . Therefore, assuming a large enough number of cycles, the denominator of (S1) becomes

$$\sum_{i=1}^{n-1} (x_i - \bar{x})^2 = (n-1) \sigma_x^2 \cong \frac{(n-1) \sigma_\delta^2}{1 - \lambda^2}. \quad (S2)$$

Using (S1) and (S2), the expectation of bias can be approximated as

$$E(\hat{\lambda} - \lambda) \cong \frac{1 - \lambda^2}{(n-1) \sigma_\delta^2} E \left( \sum_{i=1}^{n-1} \{(x_i - \bar{x})(y_i - \bar{y}) - \lambda(x_i - \bar{x})^2\} \right). \quad (S3)$$

Using  $y_i = \lambda x_i + \delta_{i+1}$ ,

$$\begin{aligned}
& \sum_{i=1}^{n-1} \{(x_i - \bar{x})(y_i - \bar{y}) - \lambda(x_i - \bar{x})^2\} \\
&= \sum_{i=1}^{n-1} \{(x_i - \bar{x})(\lambda x_i + \delta_{i+1} - \bar{y}) - \lambda(x_i^2 - 2x_i\bar{x} + \bar{x}^2)\} \\
&= \sum_{i=1}^{n-1} \{x_i\delta_{i+1} - x_i\bar{y} + x_i\bar{x}\lambda - \bar{x}\delta_{i+1} + \bar{x}\bar{y} - \lambda\bar{x}^2\} \\
&= \sum_{i=1}^{n-1} x_i\delta_{i+1} - (\bar{y} - \lambda\bar{x}) \sum_{i=1}^{n-1} x_i - \bar{x} \sum_{i=1}^{n-1} \delta_{i+1} + (n-1)(\bar{x}\bar{y} - \lambda\bar{x}^2).
\end{aligned} \tag{S4}$$

By definition of  $\bar{x}$ , the sum  $\sum_{i=1}^{n-1} x_i$  can be re-written as  $(n-1)\bar{x}$ . Therefore, from (S4),

$$\begin{aligned}
& \sum_{i=1}^{n-1} \{(x_i - \bar{x})(y_i - \bar{y}) - \lambda(x_i - \bar{x})^2\} \\
&= \sum_{i=1}^{n-1} x_i\delta_{i+1} - (n-1)(\bar{x}\bar{y} - \lambda\bar{x}^2) - \bar{x} \sum_{i=1}^{n-1} \delta_{i+1} + (n-1)(\bar{x}\bar{y} - \lambda\bar{x}^2) \\
&= \sum_{i=1}^{n-1} x_i\delta_{i+1} - \bar{x} \sum_{i=1}^{n-1} \delta_{i+1}.
\end{aligned} \tag{S5}$$

From (S3) and (S5),

$$E(\hat{\lambda} - \lambda) \cong \frac{1 - \lambda^2}{(n-1)\sigma_\delta^2} E\left(\sum_{i=1}^{n-1} x_i\delta_{i+1} - \bar{x} \sum_{i=1}^{n-1} \delta_{i+1}\right). \tag{S6}$$

By definition,  $\delta_p$  and  $\delta_q$  are independent when  $p \neq q$ . Therefore,

$$E(\delta_p \delta_q) = 0 \text{ if } p \neq q \tag{S7}$$

because

$$\int_{-\infty}^{\infty} \int_{-\infty}^{\infty} \delta_p \delta_q f(\delta_p) f(\delta_q) d\delta_p d\delta_q = \int_{-\infty}^{\infty} \delta_q \left( \int_{-\infty}^{\infty} \delta_p f(\delta_p) d\delta_p \right) d\delta_q = 0.$$

Note that the validity of (S7) does not depend on the specific shape of the distribution; the probability density function,  $f$ , can be any function as long as the mean of the noise is zero. Whether the distribution is symmetric like a normal and uniform distribution or asymmetric like a lognormal distribution, (S7) remains valid.

Now note that  $x_i$  is a weighted sum of  $\delta_1, \delta_2, \delta_3, \dots, \delta_i$ , by definition in (1). Therefore,

$E(x_i\delta_{i+1}) = 0$  for each  $i$ , and  $E\left(\sum_{i=1}^{n-1} x_i\delta_{i+1}\right) = 0$ . From (S6),

$$E(\hat{\lambda} - \lambda) \cong -\frac{1 - \lambda^2}{(n-1)\sigma_\delta^2} E\left(\bar{x} \sum_{i=1}^{n-1} \delta_{i+1}\right). \tag{S8}$$

By definition,

$$\begin{aligned}
x_1 &= \delta_1 \\
x_2 &= \lambda \delta_1 + \delta_2 \\
x_3 &= \lambda^2 \delta_1 + \lambda \delta_2 + \delta_3 \\
&\vdots \quad \quad \quad \ddots \\
x_{n-1} &= \lambda^{n-2} \delta_1 + \lambda^{n-3} \delta_2 + \cdots + \delta_{n-1}.
\end{aligned}$$

Therefore,

$$\begin{aligned}
\bar{x} &= \frac{1}{(n-1)} (x_1 + x_2 + x_3 + \cdots + x_{n-1}) \\
&= \frac{1}{(n-1)} \left( \frac{1-\lambda^{n-1}}{1-\lambda} \delta_1 + \frac{1-\lambda^{n-2}}{1-\lambda} \delta_2 + \cdots + \frac{1-\lambda^2}{1-\lambda} \delta_{n-2} + \delta_{n-1} \right). \tag{S9}
\end{aligned}$$

From (S8) and (S9),

$$E(\hat{\lambda} - \lambda) \cong -\frac{1-\lambda^2}{(n-1)^2 \sigma_\delta^2} E \left( \left( \frac{1-\lambda^{n-1}}{1-\lambda} \delta_1 + \frac{1-\lambda^{n-2}}{1-\lambda} \delta_2 + \cdots + \delta_{n-1} \right) (\delta_2 + \delta_3 + \cdots + \delta_n) \right).$$

By (S7), any term with  $\delta_p \delta_q$  ( $p \neq q$ ) does not contribute to the expectation, and only terms with  $\delta_p^2$  remain. Therefore,

$$E(\hat{\lambda} - \lambda) \cong -\frac{1-\lambda^2}{(n-1)^2 \sigma_\delta^2} E \left( \frac{1-\lambda^{n-2}}{1-\lambda} \delta_1^2 + \frac{1-\lambda^{n-3}}{1-\lambda} \delta_2^2 + \cdots + \delta_{n-1}^2 \right). \tag{S10}$$

By definition,  $E(\delta_p^2) = \sigma_\delta^2$ , and (S10) becomes

$$\begin{aligned}
E(\hat{\lambda} - \lambda) &\cong -\frac{1-\lambda^2}{(n-1)^2} \left( \frac{1-\lambda^{n-2}}{1-\lambda} + \frac{1-\lambda^{n-3}}{1-\lambda} + \cdots + \frac{1-\lambda^2}{1-\lambda} + 1 \right) \\
&= -\frac{1-\lambda^2}{(n-1)^2} \left( \frac{(n-2) - (\lambda + \lambda^2 + \cdots + \lambda^{n-2})}{1-\lambda} \right) \\
&= -\frac{1-\lambda^2}{(n-1)^2} \left( \frac{(n-1) - (1 + \lambda + \lambda^2 + \cdots + \lambda^{n-2})}{1-\lambda} \right) \\
&= -\frac{1+\lambda}{(n-1)} \left( 1 - \frac{1-\lambda^{n-1}}{(n-1)(1-\lambda)} \right). \tag{S11}
\end{aligned}$$

## Bias of Floquet Multiplier Estimation by the Yule-Walker Equation

The Yule-Walker equation estimates the Floquet multiplier as

$$\hat{\lambda}_{YW} = \frac{\sum_{i=1}^{n-1} x_i x_{i+1}}{\sum_{i=1}^{n-1} x_i^2}. \quad (\text{S12})$$

Following the same procedure that derived above (S2), the variance of  $x_i$ ,  $\sigma_x^2$  becomes

$$\sigma_x^2 = \frac{\sigma_\delta^2}{1 - \lambda^2},$$

where  $\sigma_\delta$  is the standard deviation of the noise,  $\delta_k$ . Assuming a large enough number of cycles, the denominator of (S12) approximates

$$\sum_{i=1}^{n-1} x_i^2 \cong \frac{(n-1)\sigma_\delta^2}{1 - \lambda^2}. \quad (\text{S13})$$

By definition of  $x_i$ , the numerator of (S12) becomes

$$\sum_{i=1}^{n-1} x_i x_{i+1} = \sum_{i=1}^{n-1} (\lambda^{i-1} \delta_1 + \lambda^{i-2} \delta_2 + \dots + \delta_i) (\lambda^i \delta_1 + \lambda^{i-1} \delta_2 + \dots + \delta_{i+1}). \quad (\text{S14})$$

From (S13) and (S14),

$$E(\hat{\lambda}_{YW} - \lambda) \cong \frac{1 - \lambda^2}{(n-1)\sigma_\delta^2} E\left(\sum_{i=1}^{n-1} (\lambda^{i-1} \delta_1 + \lambda^{i-2} \delta_2 + \dots + \delta_i) (\lambda^i \delta_1 + \lambda^{i-1} \delta_2 + \dots + \delta_{i+1})\right) - \lambda$$

By (S7), any term with  $\delta_p \delta_q$  ( $p \neq q$ ) does not contribute to the expectation, and only terms with  $\delta_p^2$  remain. Therefore,

$$E(\hat{\lambda}_{YW} - \lambda) \cong \frac{1 - \lambda^2}{(n-1)\sigma_\delta^2} E\left(\sum_{i=1}^{n-1} (\lambda^{2i-1} \delta_1^2 + \lambda^{2i-3} \delta_2^2 + \dots + \lambda \delta_i^2)\right) - \lambda. \quad (\text{S15})$$

Expanding what is inside  $\Sigma$ ,

$$\begin{aligned} i=1: & \quad \lambda \delta_1^2 \\ i=2: & \quad \lambda^3 \delta_1^2 + \lambda \delta_2^2 \\ i=3: & \quad \lambda^5 \delta_1^2 + \lambda^3 \delta_2^2 + \lambda \delta_3^2 \\ & \quad \vdots \\ i=n-1: & \quad \lambda^{2n-3} \delta_1^2 + \lambda^{2n-5} \delta_2^2 + \dots + \lambda \delta_{n-1}^2. \end{aligned}$$

Calculating the sum,

$$\sum_{i=1}^{n-1} (\lambda^{2i-1} \delta_1^2 + \lambda^{2i-3} \delta_2^2 + \dots + \lambda \delta_i^2) = \frac{\lambda - \lambda^{2n-1}}{1 - \lambda^2} \delta_1^2 + \frac{\lambda - \lambda^{2n-3}}{1 - \lambda^2} \delta_2^2 + \dots + \frac{\lambda - \lambda^3}{1 - \lambda^2} \delta_{n-1}^2.$$

Therefore, using  $E(\delta_p^2) = \sigma_\delta^2$ , (S15) becomes

$$\begin{aligned} E(\hat{\lambda}_{YW} - \lambda) & \cong \frac{1 - \lambda^2}{(n-1)\sigma_\delta^2} \left( \frac{(n-1)\lambda - (\lambda^{2n-1} + \lambda^{2n-3} + \dots + \lambda^3)}{1 - \lambda^2} \right) \sigma_\delta^2 - \lambda, \text{ or} \\ E(\hat{\lambda}_{YW}) & \cong \lambda - \frac{\lambda^3 - \lambda^{2n+1}}{(n-1)(1 - \lambda^2)}. \end{aligned} \quad (\text{S16})$$
